# Supplementary material
Source: PubMed Central journal article supplement (PMC5902737)

Supplemental Figure 1. Estimated prevalence values of TDP-43 proteinopathy of the included articles grouped by sex, Female (A) and Male (B).

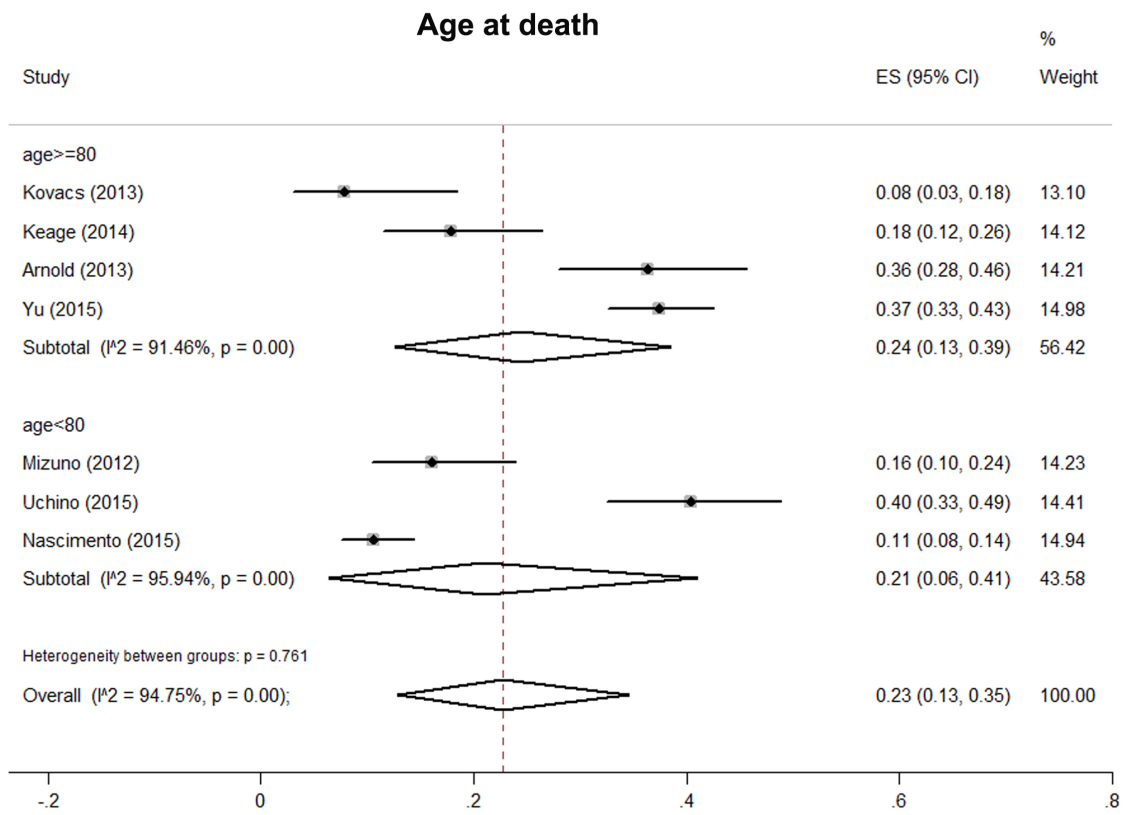

Supplement: NIHMS955261-supplement-supl_fig_1.pdf [file NIHMS955261-supplement-supl_fig_1.pdf]
