# Supplementary material
Source: PubMed Central journal article supplement (PMC5902737)

Supplemental Figure 2. Estimated prevalence values of TDP-43 proteinopathy of the included articles grouped by age at death.

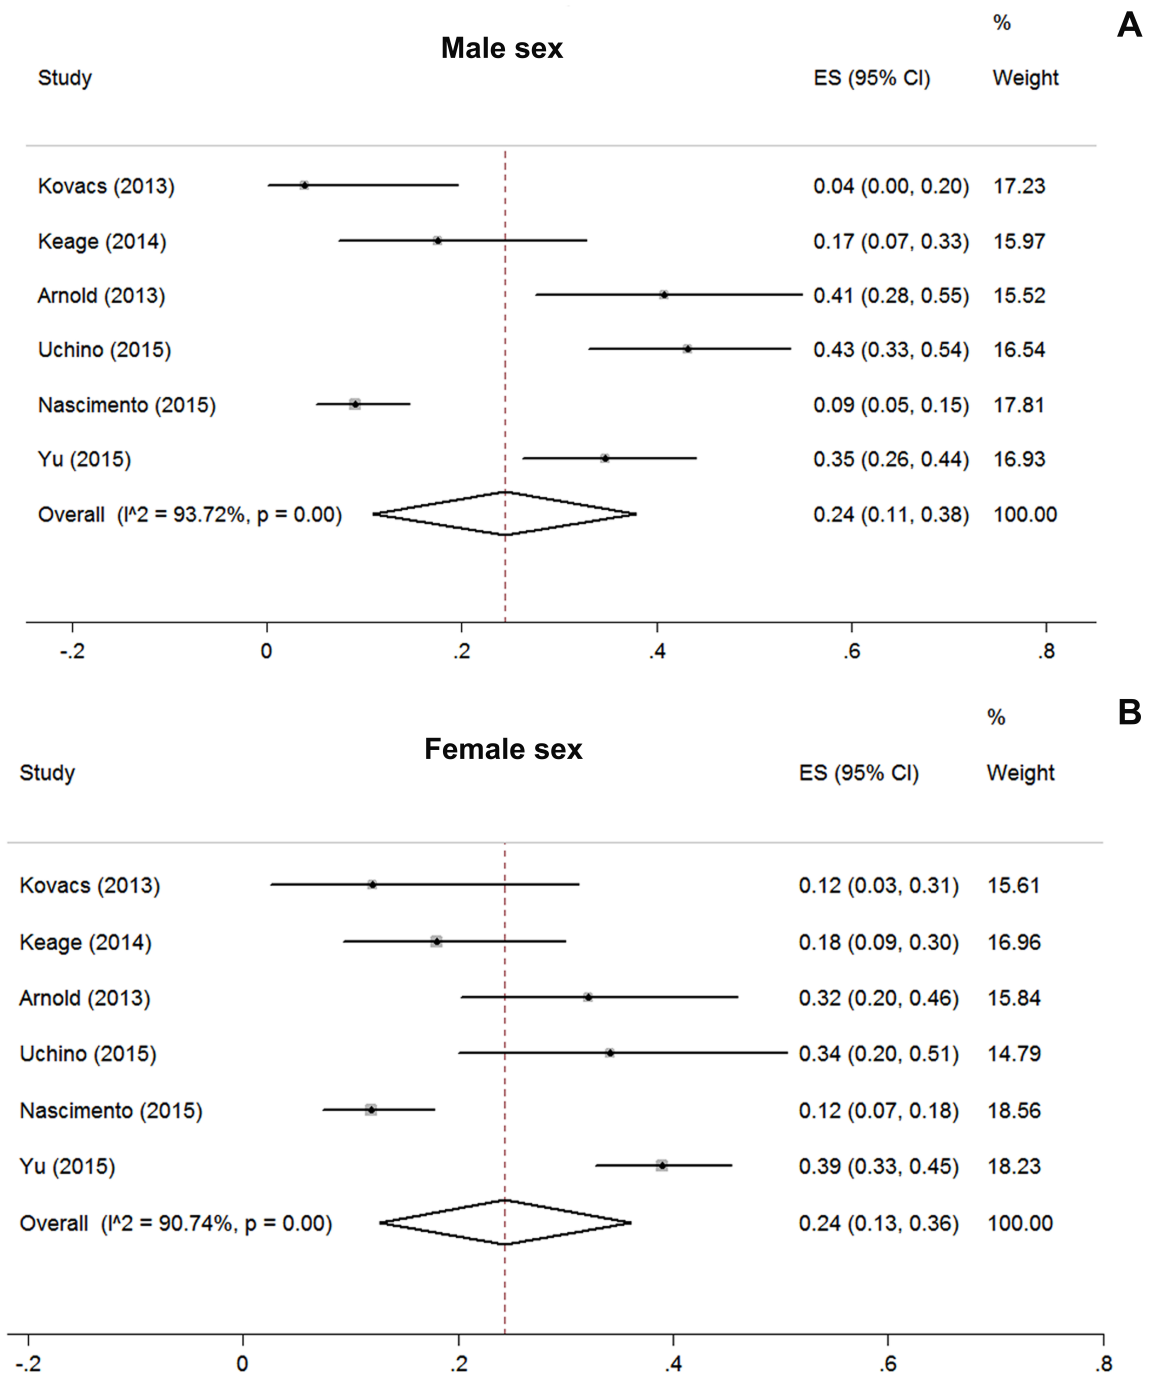

Supplement: NIHMS955261-supplement-supl_fig_2.pdf [file NIHMS955261-supplement-supl_fig_2.pdf]
