# Supplementary material
Source: PubMed Central journal article supplement (PMC5902737)

Supplemental Figure 3. Estimated prevalence of TDP-43 proteinopathy of the included articles grouped by (A) brain regions analyzed, (B) antibody used to access TDP-43 proteinopathy, (C) quality of the study, (D) and sample size.

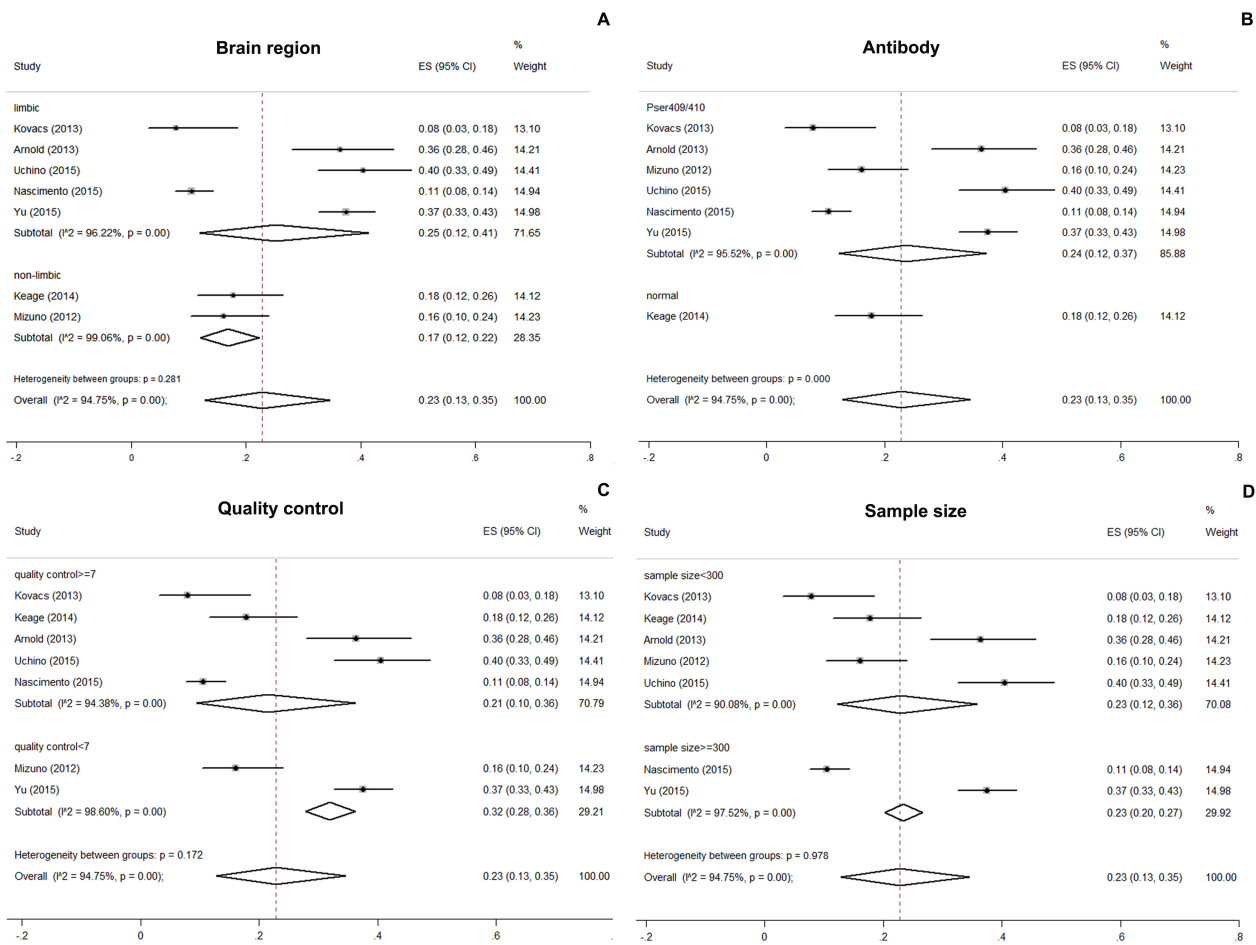

Supplement: NIHMS955261-supplement-supl_fig_3.pdf [file NIHMS955261-supplement-supl_fig_3.pdf]
