# Supplementary material
Source: PubMed Central journal article supplement (PMC5902737)

Supplemental Figure 4. Estimated prevalence of TDP-43 proteinopathy of the included articles grouped by (A) Braak  $\leq$ II and Braak  $\geq$ III (B).

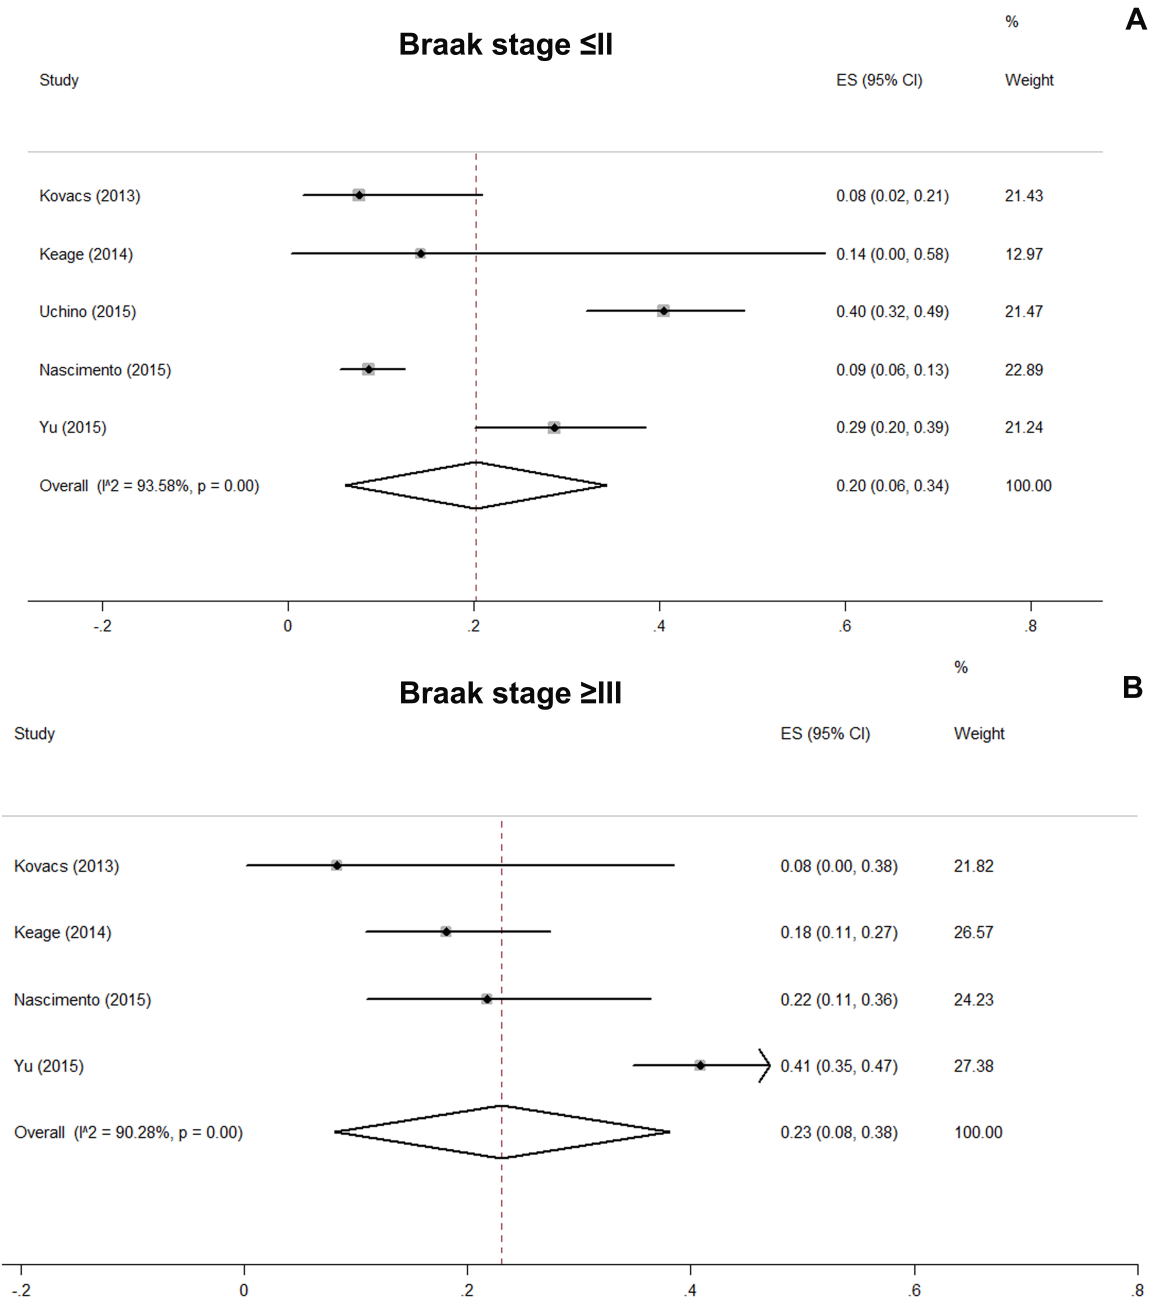

Supplement: NIHMS955261-supplement-supl_fig_4.pdf [file NIHMS955261-supplement-supl_fig_4.pdf]
