# Supplementary material
Source: PubMed Central journal article supplement (PMC5902737)

Supplemental Figure 5. Estimated prevalence of TDP-43 proteinopathy of the included articles grouped by (A) CERAD  $\leq$ A and CERAD  $\geq$ B (B).

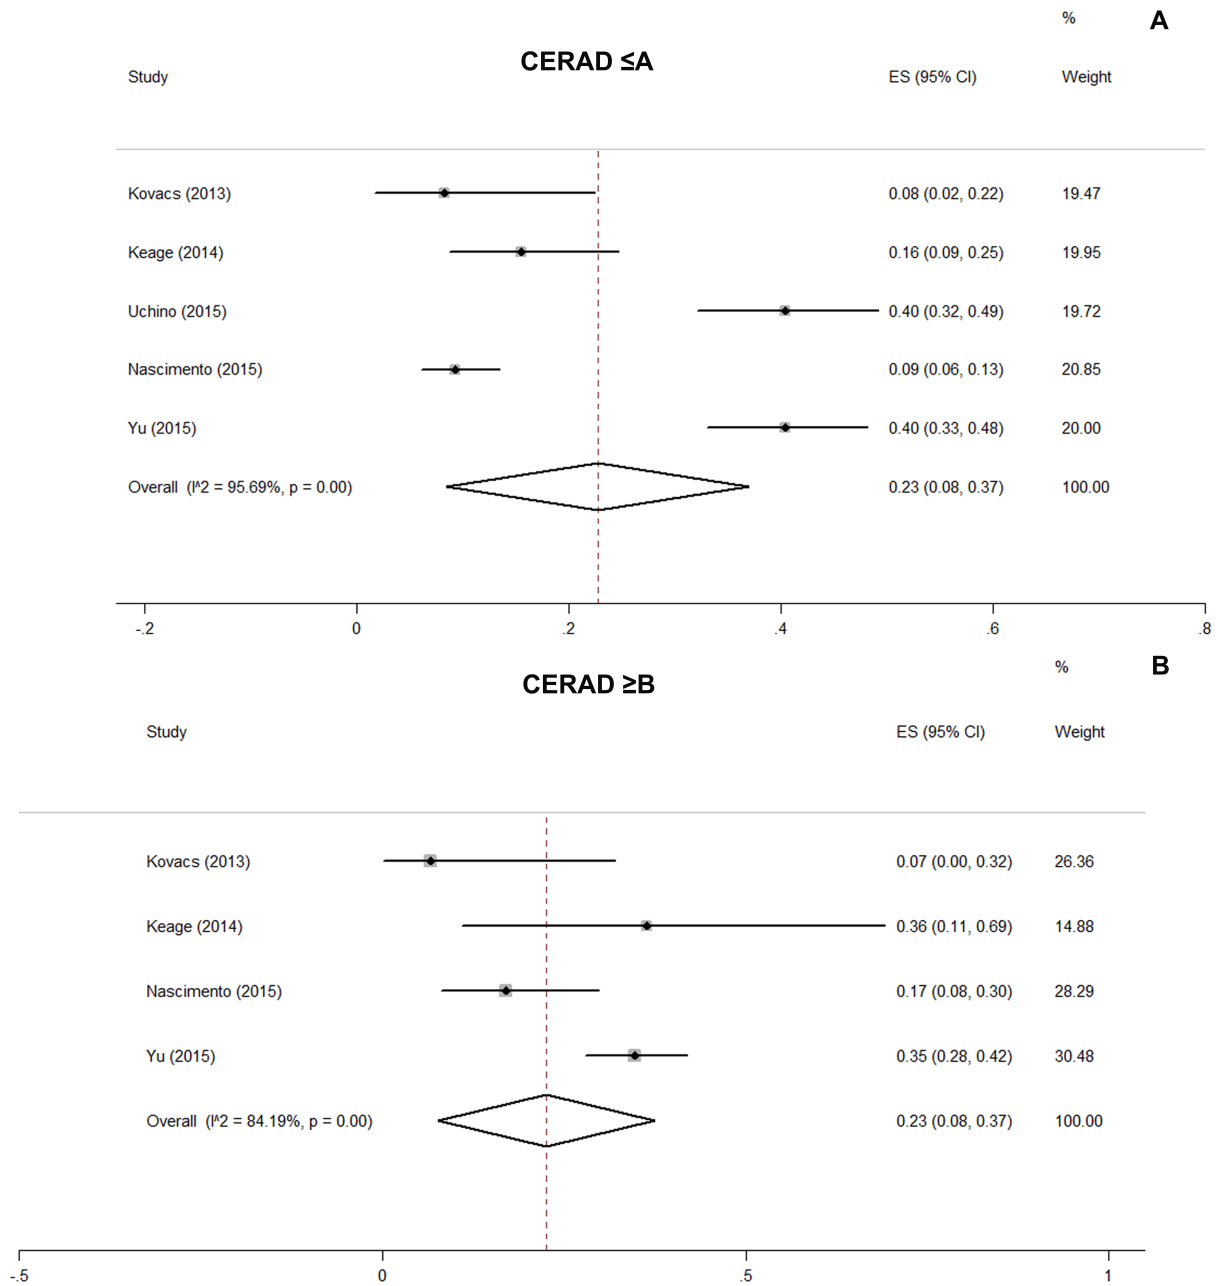

Supplement: NIHMS955261-supplement-supl_fig_5.pdf [file NIHMS955261-supplement-supl_fig_5.pdf]
