# Supplementary material
Source: PubMed Central journal article supplement (PMC5902737)

Supplemental Figure 6. Estimated prevalence of TDP-43 proteinopathy of the included articles grouped by (A) without hippocampal sclerosis and with hippocampal sclerosis (B).

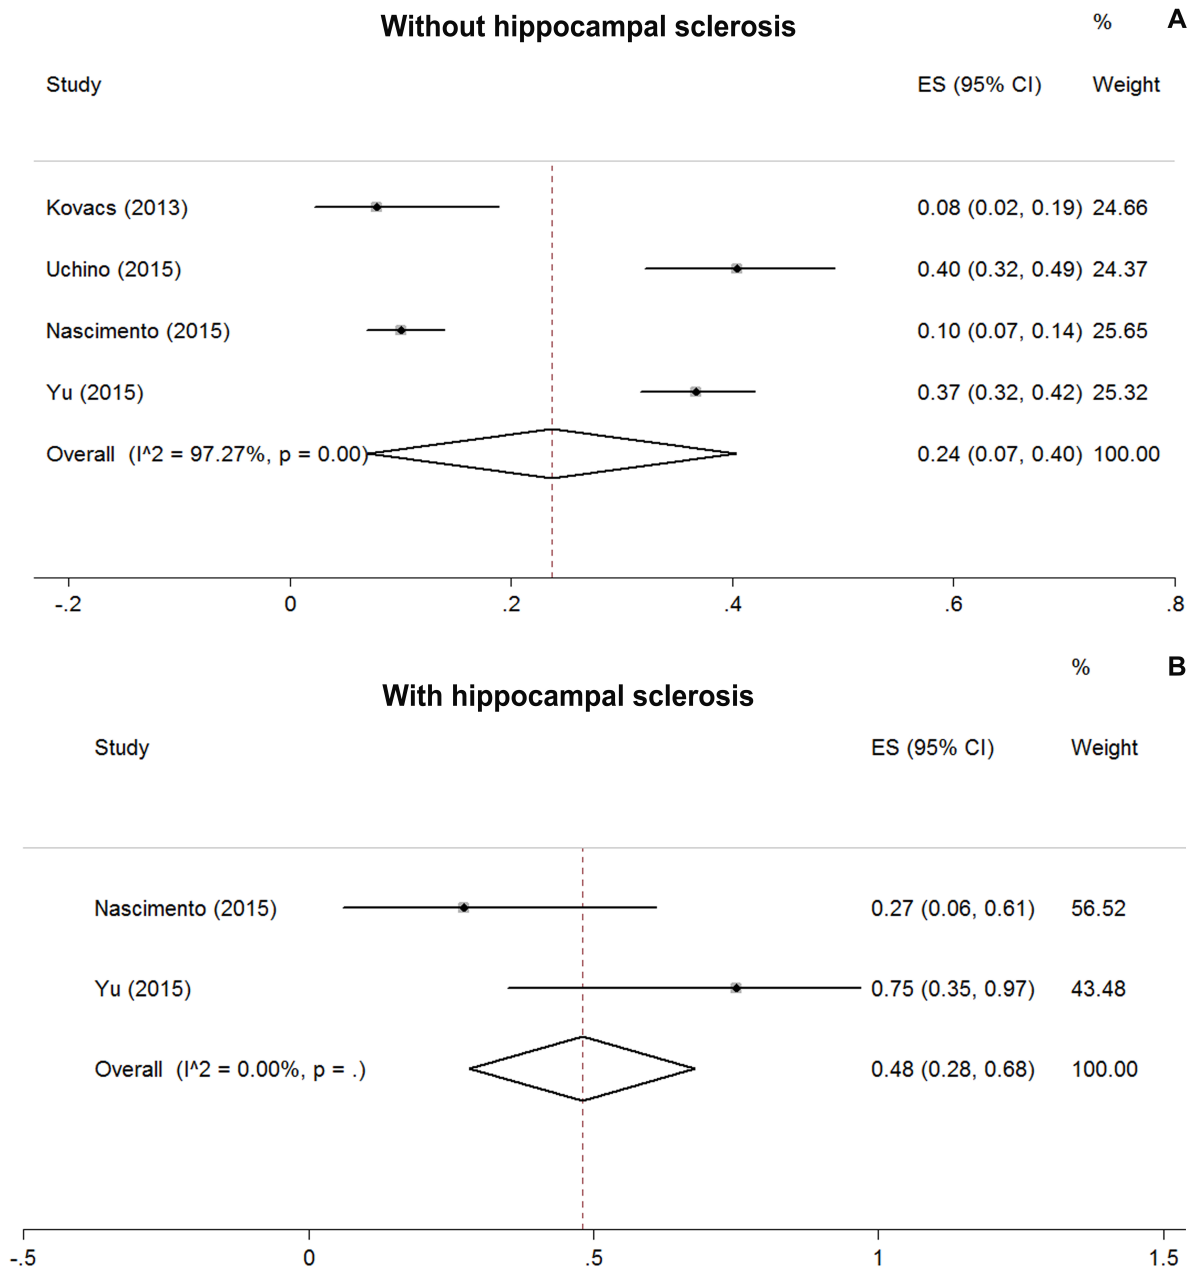

Supplement: NIHMS955261-supplement-supl_fig_6.pdf [file NIHMS955261-supplement-supl_fig_6.pdf]
